# Supplementary material for: Oral health status among long-term hospitalized adults: a cross sectional study
Source: PeerJ. 2014 Jun 10;2:e423. doi: 10.7717/peerj.423 (PMC4060041; doi:10.7717/peerj.423)
Supplement: Supplemental Information [file peerj-02-423-s001.xls]

## Sheet: Sheet1
GINGIVITIS	OHI	DMFT/DMT	possibility of examination	treated with AVILAC (LACTULOSE)	treated with CLONEX (CLONAZEPAM)	treated with DANTOIN (PHENYTOIN)	department	PI	OHI	removeble prosthetic denture	number of carries cavitations	number of teeth	nasogastric feeding tube	age	gender	name
999	999	999	0	0	0	1	1	1.6	3	1	2	4	1	68	1	1
999	999	999	0	0	0		1	999	999	0	999	0	1	90	1	2
999	999	999	0	0	0	0	1	1	3	1	4	17	1	64	0	3
999	999	999	0	0	0	0	1	1	2.7	1	9	20	0	74	0	4
999	999	999	0	0	0	0	1	0.7	0.8	1	0	26	0	33	1	5
999	999	999	0	0	1	0	1	1	3	1	2	6	0	71	1	6
999	999	999	0	0	0	0	1	2	3	1	8	8	0	80	1	7
999	999	999	0	0	0	0	1	1	1	1	0	28	0	42	1	8
999	999	999	0	0	0	0	1	999	999	1	999	0	0	90	1	9
999	999	999	0	0	1	0	1	999	999	1	999	0	1	59	0	10
999	999	999	0	0	0	0	1	999	999	1	999	0	0	55	0	11
999	999	999	0	0	0	0	1	999	999	1	999	0	1	80	0	12
999	999	999	0	0	0	0	1	999	999	999	999	999	0	84	0	13
999	999	999	0	0	0	0	1	999	999	1	999	0	1	74	0	14
999	999	999	0	0	0	0	1	1	1	1	1	28	1	79	0	15
999	999	999	0	0	0	0	1	1	1.5	1	2	28	0	74	0	16
999	999	999	0	0	0	0	1	999	999	1	999	0	1	77	0	17
999	999	999	0	0	0	0	1	999	999	1	999	0	1	88	0	18
999	999	999	0	0	0	0	1	1	1.7	1	0	18	1	34	0	19
999	999	999	0	0	0	0	1	1	3	1	7	12	0	64	0	20
999	999	999	0	0	0	0	1	1	3	1	4	17	0	71	0	21
999	999	999	0	0	0	0	1	999	999	1	999	0	1	83	0	22
999	999	999	0	0	0	0	2	999	999	0	999	0	0	87	1	23
999	999	999	0	0	0	0	2	999	999	1	999	0	1	84	0	24
999	999	999	0	1	0	0	2	1	3	1	6	26	0	85	0	25
999	999	999	0	1	0	0	2	999	999	0	999	0	0	73	1	26
999	999	999	0	1	0	0	2	999	999	1	999	0	1	78	0	27
999	999	999	0	1	0	0	2	1	3	1	9	28	0	86	0	28
999	999	999	0	0	0	0	2	999	999	0	999	0	0	87	0	29
999	999	999	0	0	0	0	2	999	999	1	999	0	0	69	1	30
999	999	999	0	1	0	0	2	999	999	0	999	0	0	70	1	31
999	999	999	0	0	0	0	2	999	999	0	999	0	0	82	1	32
999	999	999	0	0	0	0	2	999	999	0	999	2	0	75	0	33
999	999	999	0	0	0	0	2	2	3	1	2	10	0	68	0	34
999	999	999	1	0	0	0	2	999	999	999	999	999	0	61	1	35
999	999	999	0	0	0	0	2	1	3	1	2	25	0	88	1	36
999	999	999	0	0	0	0	2	999	999	0	999	0	0	80	0	37
999	999	999	0	0	1	0	3	1	3	1	0	10	1	55	0	38
999	999	999	0	0	0	0	3	1	1	1	4	23	0	70	1	39
999	999	999	0	0	0	0	3	2	3	1	1	1	1	89	1	40
999	999	999	1	0	0	0	3	2	3	1	999	8	1	88	1	41
999	999	999	0	1	1	0	3	999	999	1	999	0	0	84	0	42
999	999	999	0	0	0	1	3	999	999	1	999	0	1	57	0	43
999	999	999	1	0	0	0	3	999	999	1	999	8	1	89	0	44
999	999	999	0	0	1	0	3	1	3	1	22	22	1	57	0	45
999	999	999	0	0	1	0	3	2	3	1	2	3	1	77	0	46
999	999	999	0	0	0	0	3	999	999	1	999	0	1	57	1	47
999	999	999	0	0	1	0	3	999	999	1	999	0	1	70	0	48
999	999	999	0	0	1	0	3	999	999	0	999	0	1	88	1	49
999	999	999	0	1	0	0	3	999	999	1	3	6	1	73	0	50
999	999	999	0	0	0	0	3	999	999	0	1	3	1	70	1	51
999	999	999	0	0	0	0	3	999	999	1	999	0	1	77	0	52
999	999	999	1	0	0	0	3	999	999	999	999	999	999	73	0	53
999	999	999	0	0	0	0	3	999	999	1	999	0	1	76	1	54
999	999	999	0	0	0	0	3	1	1	1	0	28	1	68	1	55
999	999	999	0	0	0	0	3	1	1	1	2	7	0	67	1	56
999	999	999	0	0	1	0	3	2	3	1	5	13	0	83	0	57
999	999	999	0	0	0	1	3	999	999	1	999	0	1	83	0	58
999	999	999	0	0	0	0	3	1	2	1	0	28	0	34	0	59
999	999	999	0	0	1	0	3	1	2	1	0	21	0	64	0	60
999	999	999	0	0	1	0	3	999	3	1	999	9	1	62	0	61
999	999	999	0	1	0	0	3	1	2	1	3	24	1	74	0	62
999	999	999	0	1	0	0	3	999	999	1	999	0	1	83	1	63
999	999	999	0	0	1	0	3	2	3	1	4	24	0	55	1	64
999	999	999	0	0	0	0	3	999	999	1	999	0	1	81	1	65
999	999	999	1	1	1	0	3	999	999	999	999	2	1	62	1	66
999	999	999	0	0	1	0	3	999	999	0	999	0	0	81	0	67
999	999	999	0	0	0	0	3	999	3	0	3	3	0	74	1	68
999	999	999	0	1	0	0	3	1	3	1	4	5	1	80	0	69
999	999	999	0	0	0	1	3	999	3	1	2	7	1	83	0	70
999	999	999	0	0	0	0	3	1	3	1	2	3	1	74	0	71
999	999	999	0	0	0	0	3	1	3	1	3	14	1	76	0	72
999	999	999	1	0	1	0	3	999	999	999	999	999	1	77	0	73
999	999	999	0	0	0	0	3	1.5	2	1	4	4	0	90	0	74
999	999	999	0	0	0	0	3	1.2	1.5	1	999	20	1	54	0	75
999	999	999	0	0	1	0	3	999	999	0	999	0	0	82	0	76
999	999	999	0	1	0	0	3	1.4	2	1	0	19	0	64	0	77
999	999	999	0	0	0	0	3	1	2	1	0	26	1	62	0	78
999	999	999	1	0	0	0	3	999	999	999	999	999	1	67	0	79
999	999	999	0	0	0	0	3	1	3	1	3	18	1	61	0	80
999	999	999	0	0	0	0	3	1	1	0	2	9	0	69	0	81
999	999	999	0	0	1	0	3	1	3	1	3	22	1	32	0	82
999	999	999	0	0	0	1	3	999	999	1	999	0	1	86	0	83
999	999	999	0	0	0	0	3	999	999	1	999	0	1	88	1	84
999	999	999	0	0	0	0	3	1.5	3	1	4	4	1	93	1	85
999	999	999	0	0	0	0	4	2	3	1	9	22	0	64	1	86
999	999	999	0	0	0	0	4	1	1	1	3	24	0	72	0	87
999	999	999	0	0	0	0	4	999	999	0	999	0	0	77	1	88
999	999	999	0	0	0	0	4	1	1	1	3	9	0	76	0	89
999	999	999	0	0	0	0	4	999	999	0	999	0	0	77	0	90
999	999	999	0	0	1	0	4	999	999	0	999	0	0	84	0	91
999	999	999	0	0	0	0	4	1	1	0	3	9	0	72	1	92
999	999	999	0	0	1	0	4	1	1	1	0	28	0	43	0	93
999	999	999	0	0	0	0	4	1	3	1	4	26	1	75	0	94
999	999	999	0	1	1	0	4	999	999	1	999	0	1	86	1	95
999	999	999	0	0	0	0	4	1	2	1	4	28	1	60	1	96
999	999	999	1	0	1	0	4	999	999	999	999	999	0	88	1	97
999	999	999	0	0	1	0	4	999	999	1	999	0	1	84	1	98
999	999	999	0	0	0	0	4	999	999	1	999	0	0	80	1	99
999	999	999	0	1	0	0	4	1	1	1	0	26	1	67	0	100
999	999	999	0	0	0	0	4	999	999	1	999	0	1	76	0	101
999	999	999	0	1	0	0	4	1	1.5	1	4	24	0	60	0	102
999	999	999	1	0	0	0	4	999	999	999	999	999	1	63	0	103
999	999	999	0	0	1	1	4	1	2	1	6	6	1	61	1	104
999	999	999	0	0	0	0	4	1	1.4	1	0	21	1	51	1	105
999	999	999	0	0	0	0	4	1	2	1	6	24	1	80	0	106
999	999	999	0	1	0	0	4	1	2	1	4	26	1	77	0	107
999	999	999	0	1	1	0	4	2	3	1	6	6	1	68	0	108
999	999	999	0	0	1	0	4	1	2	1	4	20	1	96	1	109
999	999	999	0	0	1	0	4	999	999	1	999	0	1	61	1	110
999	999	999	0	0	1	0	4	999	999	1	999	0	0	88	1	111
999	999	999	0	0	1	0	4	999	999	1	999	0	0	93	1	112
999	999	999	0	0	1	0	4	999	999	1	999	0	1	81	1	113
999	999	999	0	0	1	0	4	999	999	1	999	0	1	56	0	114
999	999	999	0	0	1	0	4	1	1.5	1	0	28	0	62	0	115
999	999	999	0	0	0	0	4	0	1	1	0	30	1	21	0	116
999	999	999	0	1	0	0	5	1	2	1	1	8	0	43	0	117
999	999	999	0	0	1	0	5	1	1	1	3	25	0	40	0	118
999	999	999	0	0	0	0	5	1	1	1	1	28	0	36	0	119
999	999	999	0	0	0	0	5	1	1	1	0	28	0	37	0	120
999	999	999	0	1	0	0	5	2	3	1	7	7	0	57	0	121
999	999	999	0	0	0	0	5	2	3	1	3	3	0	55	0	122
999	999	999	0	0	0	0	5	2	3	1	7	11	0	54	0	123
999	999	999	0	0	0	0	5	2	3	1	2	2	0	40	0	124
999	999	999	0	0	0	0	5	1	2	1	1	8	0	46	0	125
999	999	999	0	1	1	0	5	2	3	1	7	9	0	43	0	126
999	999	999	0	0	1	0	5	2	3	1	10	10	0	54	0	127
999	999	999	0	1	0	0	5	1	2	1	2	24	0	33	0	128
999	999	999	0	0	0	0	5	1	1.6	1	2	14	0	63	0	129
999	999	999	0	0	1	0	5	999	999	1		0	0	62	0	130
999	999	999	0	0	0	0	5	1	1	1	0	13	0	33	0	131
999	999	999	0	0	1	0	6	2	3	1	6	20	0	39	1	132
999	999	999	0	0	1	0	6	1	3	1	2	26	0	60	1	133
999	999	999	0	0	0	0	6	1	2.4	1	4	24	0	36	1	134
999	999	999	0	0	0	0	6	2	3	1	19	24	0	34	1	135
999	999	999	0	0	0	0	6	1	3	1	3	25	0	42	1	136
999	999	999	0	0	1	0	6	1	3	1	5	24	0	41	1	137
999	999	999	0	0	1	0	6	2	3	1	7	7	0	49	1	138
999	999	999	0	0	0	0	6	1	3	1	3	23	0	28	1	139
999	999	999	0	0	1	0	6	2	3	1	24	24	0	34	1	140
999	999	999	0	0	0	0	6	2	3	1	6	6	0	58	1	141
999	999	999	0	1	1	0	6	1	3	1	4	6	0	34	1	142
999	999	999	0	1	1	0	6	1	2	1	10	20	0	56	1	143
999	999	999	0	0	1	0	6	1	3	1	5	22	0	49	1	144
999	999	999	0	0	0	0	6	1	2	1	1	28	0	26	1	145
999	999	999	0	0	1	0	6	1	3	1	6	26	0	38	1	146
999	999	999	0	0	0	0	6	2	3	1	20	24	0	57	1	147
999	999	999	0	0	0	0	6	1	3	1	6	25	0	60	1	148
999	999	999	0	0	0	0	6	1	3	1	4	8	0	56	1	149
999	999	999	0	1	1	0	6	1	3	1	8	8	0	29	1	150
999	999	999	0	0	1	0	6	2	3	1	8	21	0		1	151
1	3	0	0	1	0	0	7	999	999	999	999	999	0	10	0	152
1	3	0	0	0	0	0	7	999	999	999	999	999	0	9	1	153
1	3	0	0	0	1	0	7	999	999	999	999	999	0	16	0	154
1	1	0	0	0	0	0	7	999	999	999	999	999	0	3	0	155
1	1.5	0	0	0	0	0	7	999	999	999	999	999	0	13	1	156
1	3	1	0	0	1	0	7	999	999	999	999	999	0	12	0	157
1	2.5	0	0	0	0	0	7	999	999	999	999	999	0	9	1	158
1	3	1	0	0	0	0	7	999	999	999	999	999	0	12	1	159
1	3	1	0	0	0	0	7	999	999	999	999	999	0	21	1	160
1	3	1	0	0	0	0	7	999	999	999	999	999	0	11	1	161
2	1	0	0	1	0	0	7	999	999	999	999	999	0	1	0	162
1	3	0	0	1	0	0	7	999	999	999	999	999	0	17	0	163
1	2	0	0	0	0	0	7	999	999	999	999	999	0	4	0	164
1	3	0	0	0	0	0	7	999	999	999	999	999	0	4	1	165
1	3	0	0	1	0	0	7	999	999	999	999	999	0	19	1	166
2	1	0	0	0	0	0	7	999	999	999	999	999	0	2	0	167
1	3	4	0	0	0	0	7	999	999	999	999	999	1	2	0	168
2	1	0	0	0	0	0	7	999	999	999	999	999	0	4	1	169
1	2	1	0	1	1	0	7	999	999	999	999	999	0	23	0	170

## Sheet: Sheet2
GINGIVITIS	OHI	DMFT/DMT	possibility of examination	treated with AVILAC (LACTULOSE)	treated with CLONEX (CLONAZEPAM)	treated with DANTOIN (PHENYTOIN)	department	PI	OHI	removeble prosthetic denture	number of carries cavitations	number of teeth	nasogastric feeding tube	age	gender	name
999=not relevant	999=not relevant	999=not relevant	1=no possibility to check	0=yes, 1=no	0=yes, 1=no	0=yes, 1=no	1=סיעוד מורכב	999=not relevant	999=not relevant	999=not relevant	999=not relevant	999=not relevant	1=yes		0=m	= 1
1=yes			0=possible to check				2=שיקום			0=yes			0=no		1=f	= 2
2=no							3=מונשמים א'+ב'+ד			1=no						= 3
							4=תת חריפה									= 4
							5=פסיכיאטריה גברים									= 5
							6=פסיכיאטריה נשים									= 6
							7= ילדים מונשמים									= 7
																= 8
																= 9
																= 10
																= 11
																= 12
																= 13
																= 14
																= 15
																= 16
																= 17
																= 18
																= 19
																= 20
																= 21
																= 22
																= 23
																= 24
																= 25
																= 26
																= 27
																= 28
																= 29
																= 30
																= 31
																= 32
																= 33
																= 34
																= 35
																= 36
																= 37
																= 38
																= 39
																= 40
																= 41
																= 42
																= 43
																= 44
																= 45
																= 46
																= 47
																= 48
																= 49
																= 50
																= 51
																= 52
																= 53
																= 54
																= 55
																= 56
																= 57
																= 58
																= 59
																= 60
																= 61
																= 62
																= 63
																= 64
																= 65
																= 66
																= 67
																= 68
																= 69
																= 70
																= 71
																= 72
																= 73
																= 74
																= 75
																= 76
																= 77
																= 78
																= 79
																= 80
																= 81
																= 82
																= 83
																= 84
																= 85
																= 86
																= 87
																= 88
																= 89
																= 90
																= 91
																= 92
																= 93
																= 94
																= 95
																= 96
																= 97
																= 98
																= 99
																= 100
																= 101
																= 102
																= 103
																= 104
																= 105
																= 106
																= 107
																= 108
																= 109
																= 110
																= 111
																= 112
																= 113
																= 114
																= 115
																= 116
																= 117
																= 118
																= 119
																= 120
																= 121
																= 122
																= 123
																= 124
																= 125
																= 126
																= 127
																= 128
																= 129
																= 130
																= 131
																= 132
																= 133
																= 134
																= 135
																= 136
																= 137
																= 138
																= 139
																= 140
																= 141
																= 142
																= 143
																= 144
																= 145
																= 146
																= 147
																= 148
																= 149
																= 150
																= 151
																= 152
																= 153
																= 154
																= 155
																= 156
																= 157
																= 158
																= 159
																= 160
																= 161
																= 162
																= 163
																= 164
																= 165
																= 166
																= 167
																= 168
																= 169
																= 170
